# Supplementary material for: Single Phase Cool White Light Emitting Novel Ca9Al(PO4)7: Dy3+ Nanophosphor under NUV excitation
Source: Research Square preprint supplement (doi:10.21203/rs.3.rs-224262/v1), 2021-02-11
Supplement: Supplementary file 1 [file 291e584efdf0386c48464180.docx]

**Research Highlights**

The research paper entitled “**Single Phase Cool White Light Emitting Novel Ca9Al(PO4)7:Dy3+ Nanophosphor under NUV excitation**” is original research work and it highlights significant scopes in the field ofluminescent nanomaterials. Main highlight points are:

- Ca9Al(PO4)7:Dy3+ nanophosphors have been synthesized via combustion method.
- Critical distance for energy transfer has been calculated.
- These nanophosphors are suitable candidate for solid state lighting.
- Crystal structure of this nanophosphor has been studied.
